# Supplementary material for: Weight Trimming and Propensity Score Weighting
Source: PubMed Central journal article supplement (PMC3069059; doi:10.1371/journal.pone.0018174), 2011-03-31
Supplement: pone.0018174.s001.pdf [file pone.0018174.s001.pdf]

```

# SUPPORTING INFORMATION TEXT S1
#-----Overview-----#
# Author: Brian Lee
# This script is used for dataset generation for
# the manuscript "Weight trimming and propensity score weighting"
# in PLoS ONE 2011.
# The study design is based on methods printed in
# Setoguchi et al., "Evaluating uses of data mining
# techniques in propensity score estimation: a
# simulation study." Pharmacoepi Drug Saf 2008.

#-----Functions-----#
# function: generate continuous random variable correlated to variable x by rho
# invoked by the "F.generate" function
# Parameters -
#   x - data vector
#   rho - correlation coefficient
# Returns -
#   a correlated data vector of the same length as x

F.sample.cor <- function(x, rho) {
  y <- (rho * (x - mean(x)))/sqrt(var(x)) + sqrt(1 - rho^2) * rnorm(length(x))
  #cat("Sample corr = ", cor(x, y), "\n")
  return(y)
}

# function: generate simulation datasets
# inputs: sample size N, scenario
# outputs: 1 dataset of size N
# binary variables: w1, w3, w5, w6, w8, w9
# continuous variables: w2, w4, w7, w10
# confounders: w1, w2, w3, w4
# exposure predictors only: w5, w6, w7
# outcome predictors only: w8, w9, w10
# correlations: (w1,w5)=0.2, (w2,w6)=0.9, (w3,w8)=0.2, (w4,w9)=0.9

F.generate <- function(size, scenario) {
  w1 <- rnorm(size, mean=0, sd=1)
  w2 <- rnorm(size, mean=0, sd=1)
  w3 <- rnorm(size, mean=0, sd=1)
  w4 <- rnorm(size, mean=0, sd=1)
  w5 <- F.sample.cor(w1, 0.2)
  w6 <- F.sample.cor(w2, 0.9)
  w7 <- rnorm(size, mean=0, sd=1)
  w8 <- F.sample.cor(w3, 0.2)
  w9 <- F.sample.cor(w4, 0.9)
  w10 <- rnorm(size, mean=0, sd=1)

  #~~ dichotomize variables (will attenuate correlations above)
  w1 <- ifelse(w1 > mean(w1), 1, 0)
  w3 <- ifelse(w3 > mean(w3), 1, 0)
  w5 <- ifelse(w5 > mean(w5), 1, 0)
  w6 <- ifelse(w6 > mean(w6), 1, 0)
  w8 <- ifelse(w8 > mean(w8), 1, 0)
  w9 <- ifelse(w9 > mean(w9), 1, 0)

  #~~ scenarios for data generation models
  # A: model with additivity and linearity
  # B: mild non-linearity
  # C: moderate non-linearity
  # D: mild non-additivity
  # E: mild non-additivity and non-linearity
  # F: moderate non-additivity
  # G: moderate non-additivity and non-linearity

  # binary exposure modeling
  if (scenario == "A") {
    z.a_trueps <- (1 + exp( -(0 + b1*w1 + b2*w2 + b3*w3 + b4*w4 + b5*w5 + b6*w6 + b7*w7) ) )
  } else
  if (scenario == "B") {

```

```

    z.a_trueps <- (1 + exp( -(0 + b1*w1 + b2*w2 + b3*w3 + b4*w4 + b5*w5 + b6*w6 + b7*w7
      + b2*w2*w2) ) )^-1
  } else
if (scenario == "C") {
  z.a_trueps <- (1 + exp( -(0 + b1*w1 + b2*w2 + b3*w3 + b4*w4 + b5*w5 + b6*w6 + b7*w7
    + b2*w2*w2 + b4*w4*w4 + b7*w7*w7) ) )^-1
  } else
if (scenario == "D") {
  z.a_trueps <- (1 + exp( -(0 + b1*w1 + b2*w2 + b3*w3 + b4*w4 + b5*w5 + b6*w6 + b7*w7
    + b1*0.5*w1*w3 + b2*0.7*w2*w4 + b4*0.5*w4*w5 + b5*0.5*w5*w6) ) )^-1
  } else
if (scenario == "E") {
  z.a_trueps <- (1 + exp( -(0 + b1*w1 + b2*w2 + b3*w3 + b4*w4 + b5*w5 + b6*w6 + b7*w7
    + b2*w2*w2 + b1*0.5*w1*w3 + b2*0.7*w2*w4 + b4*0.5*w4*w5 + b5*0.5*w5*w6) ) )^-1
  } else
if (scenario == "F") {
  z.a_trueps <- (1 + exp( -(0 + b1*w1 + b2*w2 + b3*w3 + b4*w4 + b5*w5 + b6*w6 + b7*w7
    + b1*0.5*w1*w3 + b2*0.7*w2*w4 + b3*0.5*w3*w5 + b4*0.7*w4*w6 + b5*0.5*w5*w7
    + b1*0.5*w1*w6 + b2*0.7*w2*w3 + b3*0.5*w3*w4 + b4*0.5*w4*w5 + b5*0.5*w5*w6) ) )^-1
  } else
{
# scenario G
  z.a_trueps <- (1 + exp( -(0 + b1*w1 + b2*w2 + b3*w3 + b4*w4 + b5*w5 + b6*w6 + b7*w7
    + b2*w2*w2 + b4*w4*w4 + b7*w7*w7 + b1*0.5*w1*w3 + b2*0.7*w2*w4 + b3*0.5*w3*w5
    + b4*0.7*w4*w6 + b5*0.5*w5*w7 + b1*0.5*w1*w6 + b2*0.7*w2*w3 + b3*0.5*w3*w4
    + b4*0.5*w4*w5 + b5*0.5*w5*w6) ) )^-1
}

# probability of exposure: random number betw 0 and 1
# if estimated true ps > prob.exposure, than received exposure (z.a=1)
prob.exposure <- runif(size)
z.a <- ifelse(z.a_trueps > prob.exposure, 1, 0)

# continuous outcome modeling
y.a <- a0 + a1*w1 + a2*w2 + a3*w3 + a4*w4 + a5*w8 + a6*w9 + a7*w10 + g1*z.a

# create simulation dataset
sim <- as.data.frame(cbind(w1, w2, w3, w4, w5, w6, w7, w8, w9, w10, z.a, y.a))
return(sim)
}

#~~~~~Global Variables~~~~~#

#~~ coefficients for data generation models
b0 <- 0
b1 <- 0.8
b2 <- -0.25
b3 <- 0.6
b4 <- -0.4
b5 <- -0.8
b6 <- -0.5
b7 <- 0.7
a0 <- -3.85
a1 <- 0.3
a2 <- -0.36
a3 <- -0.73
a4 <- -0.2
a5 <- 0.71
a6 <- -0.19
a7 <- 0.26
g1 <- -0.4 # effect of exposure

#~~~~~Calls~~~~~#

# this generates datasets
# Example: Generate 1000 datasets of N=500 in scenario G
simdata <- replicate(1000, F.generate(500, "G"))

```
